# Supplementary material for: Intestinal peroxisomal fatty acid β-oxidation regulates neural serotonin signaling through a feedback mechanism
Source: PLoS Biol. 2019 Dec 5;17(12):e3000242. doi: 10.1371/journal.pbio.3000242 (PMC6917301; doi:10.1371/journal.pbio.3000242)
Supplement: S1 Table — (XLSX) [file pbio.3000242.s010.xlsx]

## Sheet: unnormalized feeding data
Figure 1A				Figure 1D
	vehicle	5mM 5HT			vehicle	5mM 5HT	vehicle post fast	5mM 5HT post fast
wild-type	44.5 ± 0.29	49.5 ± 0.58		wild-type	44.7 ± 0.25	47.5 ± 0.32	44.6 ± 0.27	48.4 ± 0.35
acox-1	43.85 ± 0.25	43.5 ± 0.30		acox-1	43.7 ± 0.21	43.7 ± 0.25	44.9 ± 0.23	46.6 ± 0.38
Figure 1B				Figure 2D
wild-type	45.3 ± 0.37				vehicle	5mM 5HT
aak-2	49.2 ± 0.51			wild-type	44 ± 0.22	48.2 ± 0.26
acox-1	44.6 ± 0.45			acox-1	43.6 ± 0.36	43.6 ± 0.19
aak-2;acox-1	43.3 ± 0.37			acox-1;Pacox-1(+)	43.1 ± 0.25	46.9 ± 0.90
				acox-1; Pvha-6::(+)	44.4 ± 0.27	48.7 ± 0.56
				acox-1;Pdpy-7::(+)	44.4 ± 0.28	44.7 ± 0.36
Figure 3A
	vehicle	1hr on 5mM 5HT	Triacsin C	5mM 5HT post-TC treatment
wild-type	44.7 ± 0.24	47.5 ± 0.32	46.3 ± 0.27	49.9 ± 0.26
acox-1	43.7 ± 0.21	43.7 ± 0.25	46.6 ± 0.16	48.9 ± 0.4
Figure 3B
vehicle	43.7 ± 0.21
Oleic Acid (OA)	39.7 ± 0.61
Triacsin C (TC)	45.3 ± 0.25
TC pretreat + OA	43.8 ± 0.39
Figure 6A				Figure 6B
	vehicle	5mM 5HT			vector	vector RNAi + 5mM 5HT	egl-2 RNAi	egl-2 RNAi + 5mM 5HT
wild-type	43.4 ± 0.42	47.5 ± 0.28		wild-type	43.4 ± 0.42	47.5 ± 0.28	43.9 ± 1.19	48.0 ± 1.56
egl-2(gf)	43.1 ± 0.40	43.7 ± 0.36		acox-1	42.5 ± 0.34	42.3 ± 0.53	41.0 ± 1.33	45.7 ± 1.15
egl-2(gf) + egl-2 RNAi	42.8 ± 1.31	47.6 ± 0.84
Figure 6C				Figure 6D
	vehicle	5mM 5HT			vehicle	1hr Oleic Acid
wild-type	43.8 ± 0.25	49.4 ± 0.31		wild-type	43.6 ± 0.21	39.7 ± 0.61
acox-1	43.4 ± 0.40	42.9 ± 0.52		egl-2(lf)	44.6 ± 0.27	43.3 ± 0.37
egl-2(lf)	44.1 ± 0.35	47.1 ± 0.18
acox-1;egl-2	43.6 ± 0.16	47.1 ± 0.59
Figure 7B				Figure 7C
	vehicle	5mM 5HT			vehicle	5mM 5HT
wild-type	44.8 ± 0.25	50.4 ± 0.37		wild-type	44.6 ± 0.25	49.1 ± 1.27
WT;gcy-32p::egl-2(gf)	44.4 ± 0.42	45.2 ± 0.41		acox-1	44.6 ± 1.12	43.7 ± 1.49
				WT;gcy-32p::PKC-1(gf)	49.3 ± 1.44	50.4 ± 0.91
				acox-1;gcy-32p::PKC-1(gf)	49.3 ± 2.05	49.9 ± 1.55
Figure 7D
	vehicle	5mM 5HT
WT	43.8 ± 0.30	49.3 ± 0.48
acox-1	43.5 ± 0.34	43.8 ± 0.29
acox-1; Pflp-8::egl-2(SAS) line #1	43.4 ± 0.42	47.5 ± 0.37
acox-1; Pflp-8::egl-2(SAS) line #2	43.6 ± 0.39	47.9 ± 0.46
acox-1; Pflp-8::egl-2(SAS) line #3	43.6 ± 0.39	48.2 ± 0.60
